# Supplementary material for: Space use and movement of jaguar ( Panthera onca ) in western Paraguay
Source: publisher site journal article supplement (doi:10.1515/mammalia-2017-0040), 2018-02-24
Supplement: Supplementary file 1 [file Supplemental Table 1_Revised.docx]

Supplemental Table 1.Comparative home range sizes for study jaguars based upon 95% autocorrelated kernel density estimator (AKDE), 95% kernel density estimator (KDE), and 95% minimum convex polygon (MCP).

| ID | Sex/age (yr) | AKDE Home range (km2) (95% CI) | 95% KDE (km2) | 95% MCP (km2) |
| --- | --- | --- | --- | --- |
| *Dry Chaco* | | | | |
| DC1 | M/5 | 2143 (1558-2820) | 1674 | 1813 |
| DC3 | M/2 | 421 (288-580) | 193 | 152 |
| DC4 | M/5 | 550 (349-797) | 453 | 389 |
| DC6 | M/7 | 1063 (822-1335) | 877 | 950 |
| DC7 | M/5 | 445 (381-515) | 418 | 587 |
| DC5 | F/6 | 591 (411-805) | 479 | 475 |
| DC2 | F/8 | 511 (363-683) | 402 | 298 |
| *Humid Chaco/Pantanal* | | | | |
| Pan2 | F/2 | 71 (58-85) | 71 | 87 |
| HC5 | F/4 | 92 (75-110) | 102 | 89 |
| HC4 | F/3 | 270 (187-369) | 176 | 151 |
| HC8 | F/1 | 121 (71-183) | 87 | 88 |
| HC7 | F/6 | 246 (172-332) | 205 | 184 |
| HC9 | F/6 | 118 (83-159) | 87 | 96 |
| Pan3 | M/6 | 428 (320-550) | 350 | 288 |
| HC3 | M/4 | 424 (290-584) | 302 | 255 |
| HC6 | M/10 | 341 (216-494) | 280 | 256 |
| Pan1 | F/4 | 550 (349-797) | 59 | 67 |
| HC1 | M/6 | 958 (534-1505) | 644 | 491 |
| HC2 | F/6 | 73 (35-125) | 52 | 36 |
